# Supplementary material for: Thalamostriatal degeneration contributes to dystonia and cholinergic interneuron dysfunction in a mouse model of Huntington’s disease
Source: PubMed Central journal article supplement (PMC7007676; doi:10.1186/s40478-020-0878-0), 2020-02-07
Supplement: 40478_2020_878_MOESM1_ESM.pdf [file 40478_2020_878_MOESM1_ESM.pdf]

## Supplementary Materials

**Title:** Thalamostriatal Degeneration Contributes to Cholinergic Interneuron Loss and Dystonia in a Huntington's Mouse Model

**Journal Title :** Acta Neuropathologica Communications

**Authors:** Gabriel Crevier-Sorbo, Vladimir V. Rymar, Raphael Crevier-Sorbo, Abbas F. Sadikot

**Author Affiliation:** Department of Neurology and Neurosurgery, Montreal Neurological Institute, McGill University, 3801 University street, H3A 2B4, Montreal, Quebec, Canada

**Corresponding Author:** Abbas F. Sadikot: abbas.sadikot@mcgill.ca, phone: 514 398 8542

## Experimental Timeline

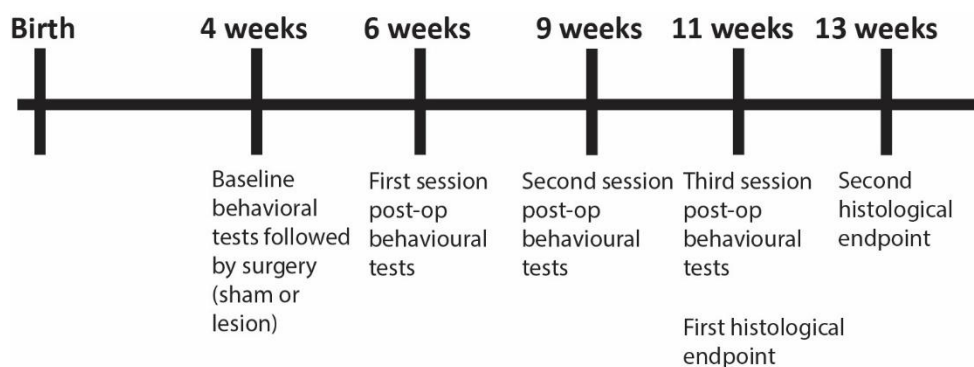

## Supplementary Figures

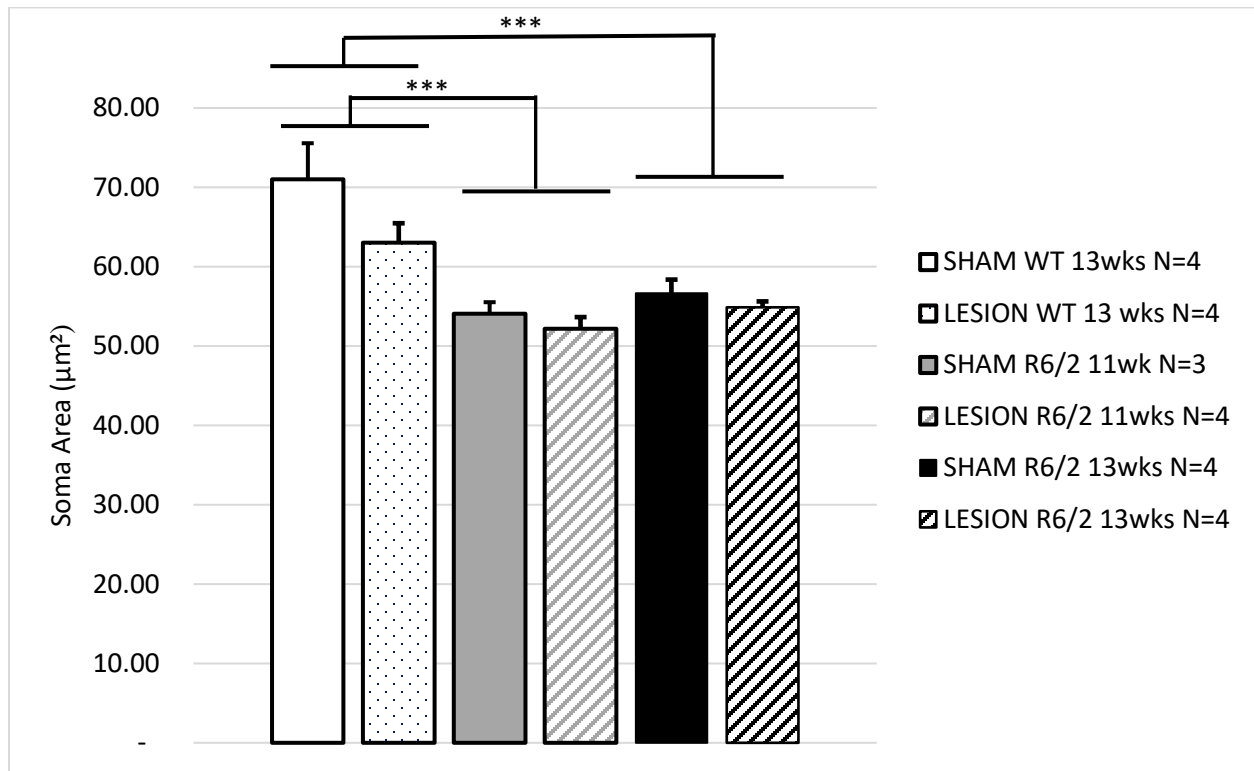

**Supplementary Fig. 1: Matrix Neuron Soma Area in WT and R6/2 mice.** Demonstrates a reduction in the R6/2 soma area of matrix neurons compared to WT at both 11 and 13wks with no significant effect of PF lesion. A 2-way between subject ANOVA was applied to the data and was followed by a Tukey HSD *post hoc* test where appropriate. \*\*\* $p < 0.001$ .

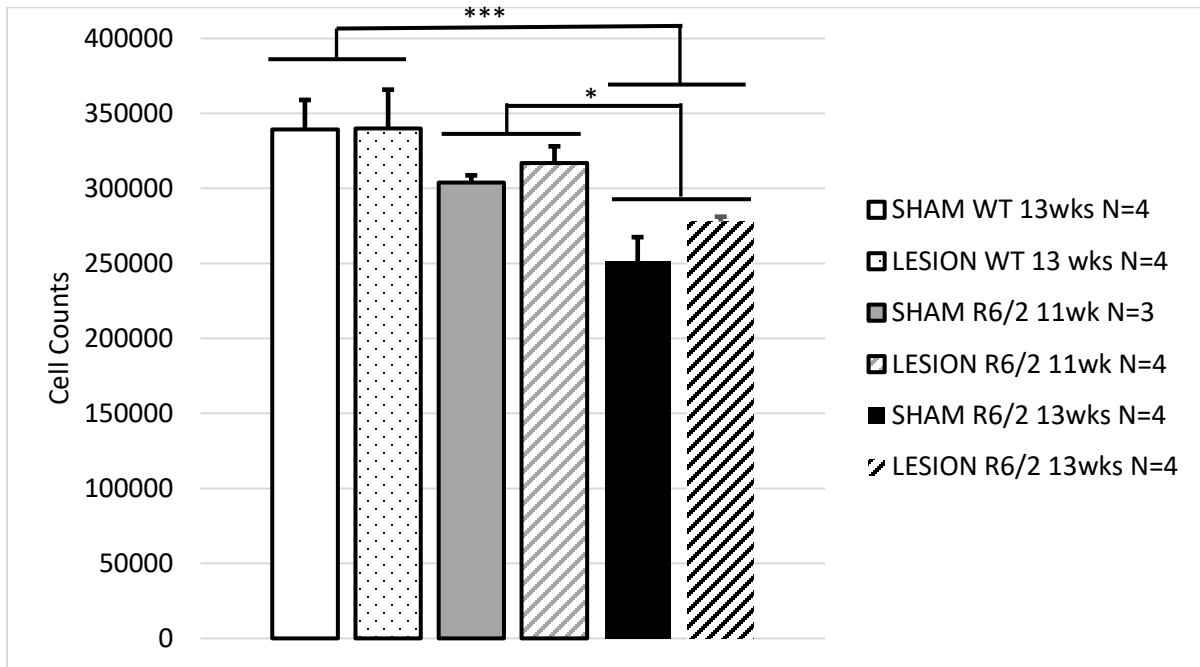

**Supplementary Fig. 2: Striosome cell count in WT and R6/2 mice.** Demonstrates a trend to reduction in number of striosome neurons is seen in R6/2 compared WT mice that was not significant (~8% decrease,  $p=0.23$ ) at 11wks but was significant ( $p<0.05$ ) at 13wks. There was no significant effect of thalamic lesion on striosome neuron number. A 2-way between subject ANOVA was applied, followed by a Tukey HSD *post hoc* test. \* $p<0.05$ ; \*\*\* $p<0.001$ .

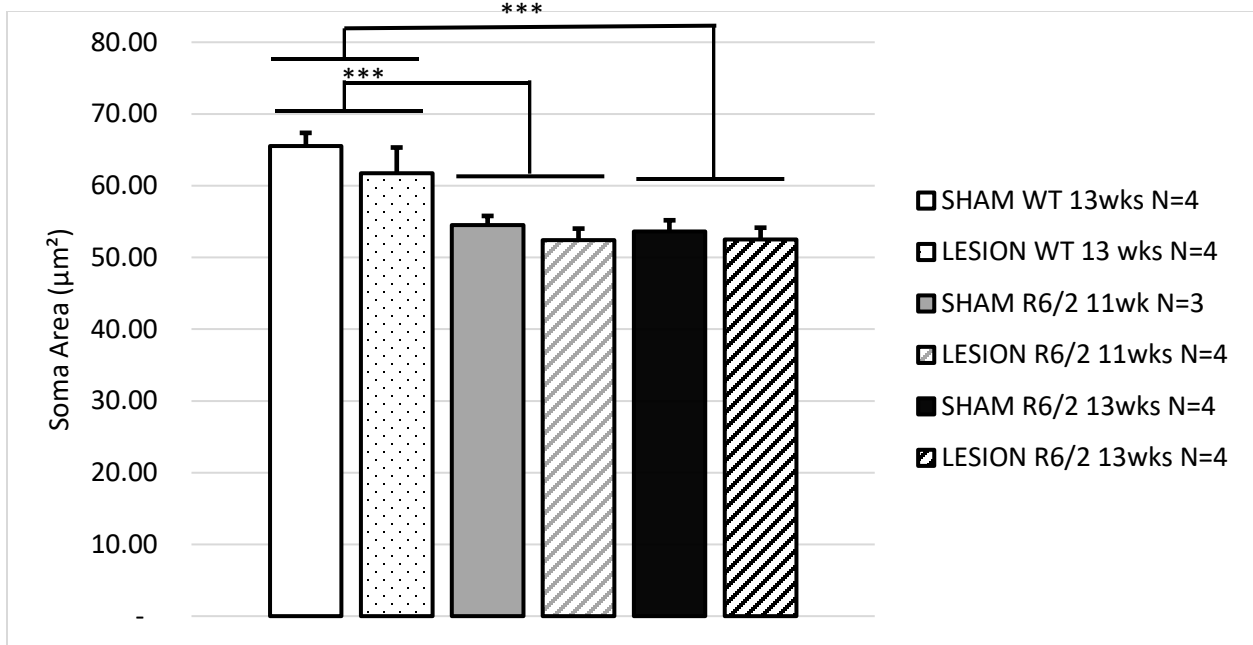

**Supplementary Fig. 3: Striosome Neuron Soma Area in WT and R6/2.** Demonstrates a reduction in soma area of striosome neurons in R6/2 animals at both 11 and 13 wks compared to WT. There is no significant effect of lesion on striosome neuron soma area. A 2-way between subject ANOVA was applied followed by a Tukey HSD *post hoc* test. \*\*\* $p < 0.001$ .

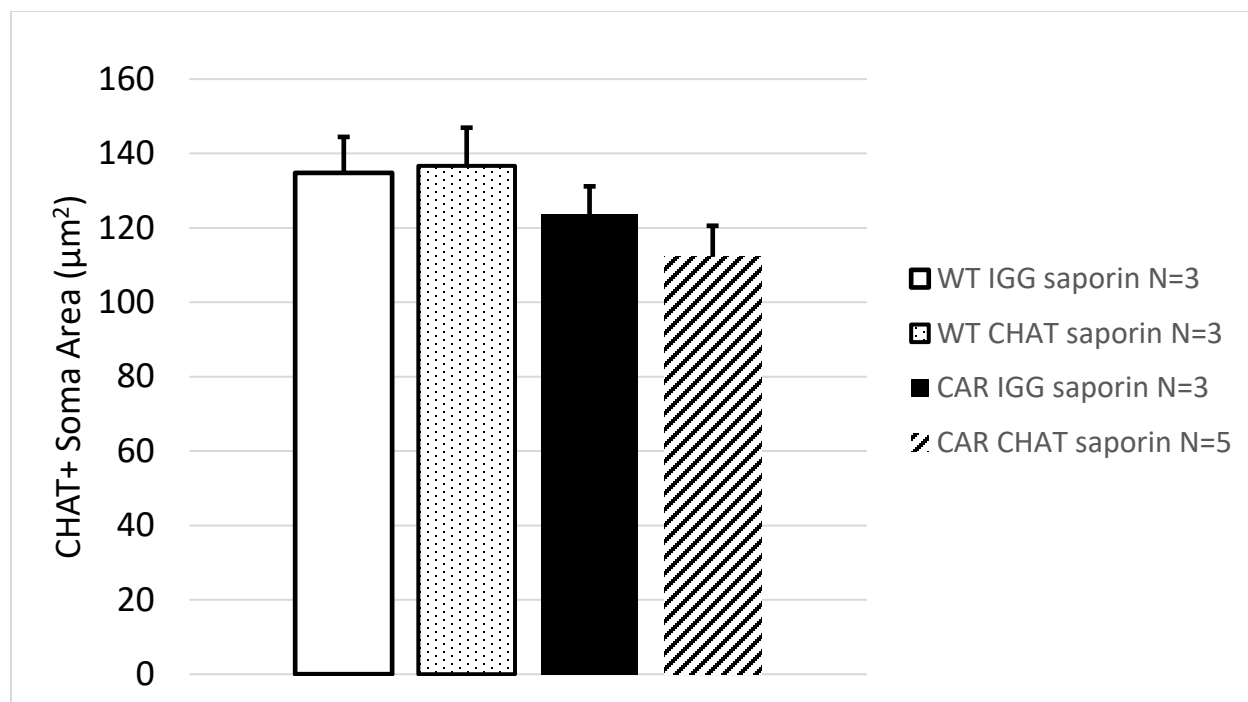

**Supplementary Fig. 4: CHAT+ Cell Soma Area in Saporin Treated Animals.** No significant difference between remaining CHAT+ cells in either WT or R6/2 animals treated with saporin toxins. A 2-way between subject ANOVA was applied to the data and was followed by a Tukey HSD *post hoc* test.
